# Supplementary material
Source: PubMed Central journal article supplement (PMC4758134)

# Supplementary Figure 1

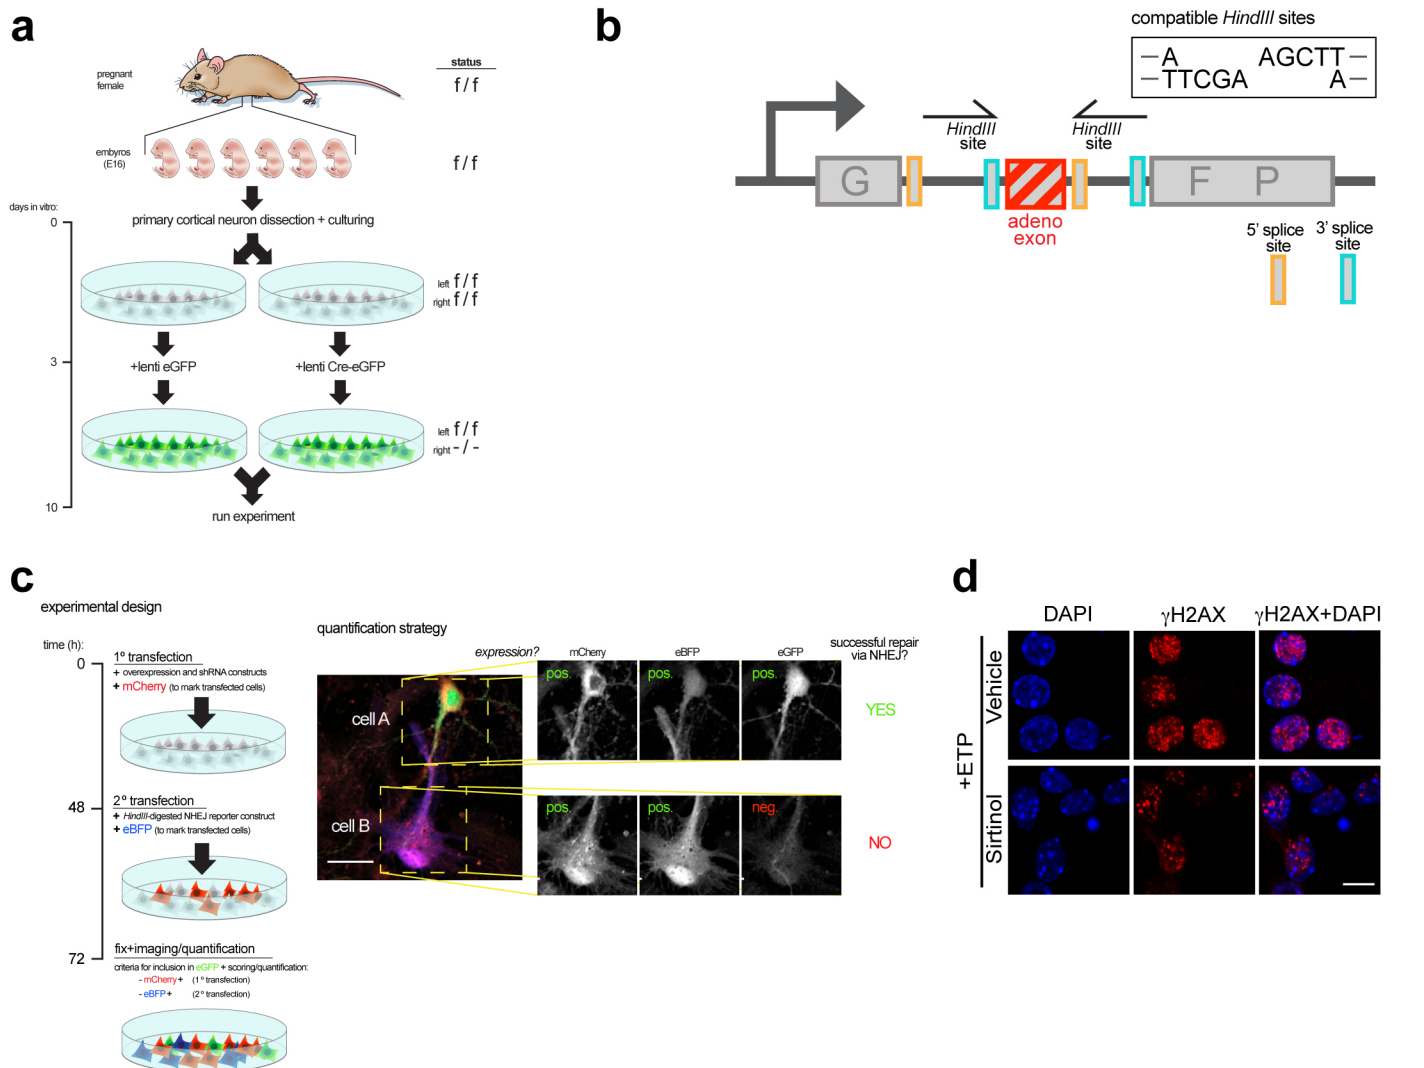

**Supplementary Figure 1. a**, Schematic for generating *Sirt1* KO neurons. Dissociated primary cortical neurons were cultured from E16 *Sirt1* *F/F* embryos. DIV3 cultures were infected with a lentiviral vector carrying either a functional Cre recombinase (Cre-eGFP) or a non-functional Cre (eGFP). Neurons were usually used 7 days after infection with Cre-eGFP. A similar strategy was used to generate *Hdac1* KO neurons. **b**, Construct used to measure efficiency of DNA repair using NHEJ. In this construct, a functional *eGFP* gene is interrupted by an intron. The presence of an adenoviral exon sequence within the intron prevents it from normally being spliced out. Generation of a DSB using *HindIII* and its subsequent repair using NHEJ disrupts the adenoviral exon sequence. Consequently, the intron is spliced out, allowing for expression of GFP. In this way, GFP+ cells can be used to score the efficiency of NHEJ. **c**, Outline of the experimental scheme used to adapt the NHEJ reporter assay to cultured primary neurons in our study. **d**, Primary cortical neurons (DIV14) were incubated overnight with the SIRT1 inhibitor, sirtinol (20 $\mu$ M final), then treated with 2 $\mu$ M etoposide for 1 h and analyzed as in Fig. 1c. Scale bar = 10 $\mu$ m.

## Supplementary Figure 2

**a**

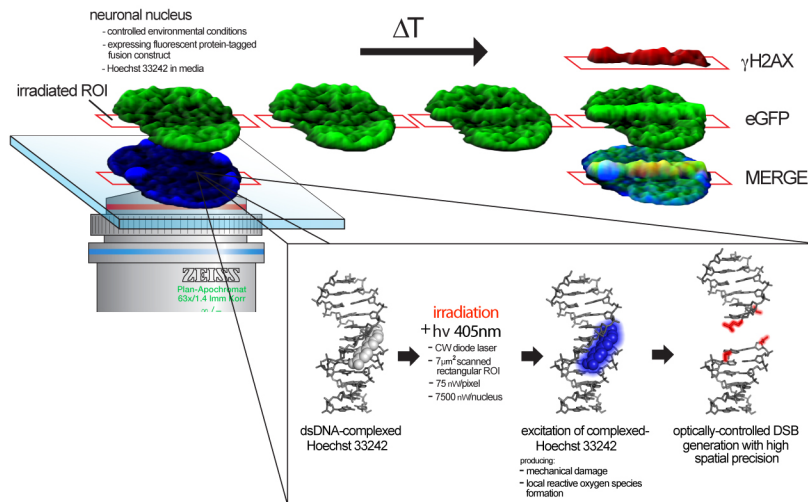

**b**

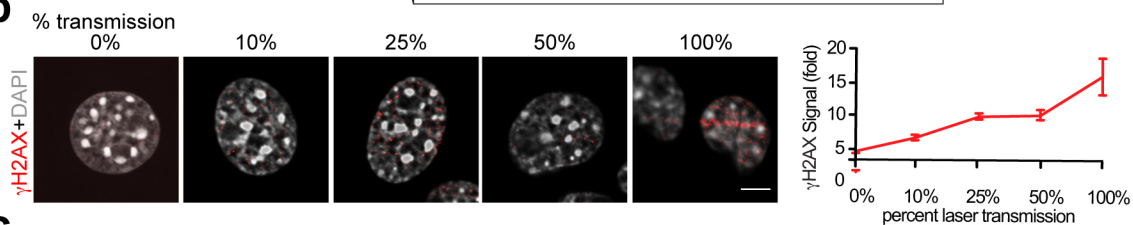

**c**

| EmGFP-SIRT1 |                    | HDAC1-EmGFP |                    |
|-------------|--------------------|-------------|--------------------|
| siRNA       | $\tau_{1/2}$ (sec) | siRNA       | $\tau_{1/2}$ (sec) |
| scrambled   | 2.82 ± 0.79        | scrambled   | 61.43 ± 13.77      |
| MRE11       | 1.93 ± 1.12        | MRE11       | 76.40 ± 9.48       |
| RAD50       | 1.80 ± 0.52        | RAD50       | 72.89 ± 4.35       |
| NBS1        | 3.75 ± 0.44        | NBS1        | 70.10 ± 9.80       |
| ATM         | 16.60 ± 1.41       | ATM         | 36.28 ± 3.40       |
| KU70        | 2.69 ± 0.75        | KU70        | 139.30 ± 24.80     |
| KU80        | 2.99 ± 0.71        | KU80        | 219.90 ± 20.19     |
| HDAC1       | 2.87 ± 0.42        | SIRT1       | 85.51 ± 15.04      |
| CHD4        | 2.16 ± 0.40        | CHD4        | 133.80 ± 25.70     |

**d**

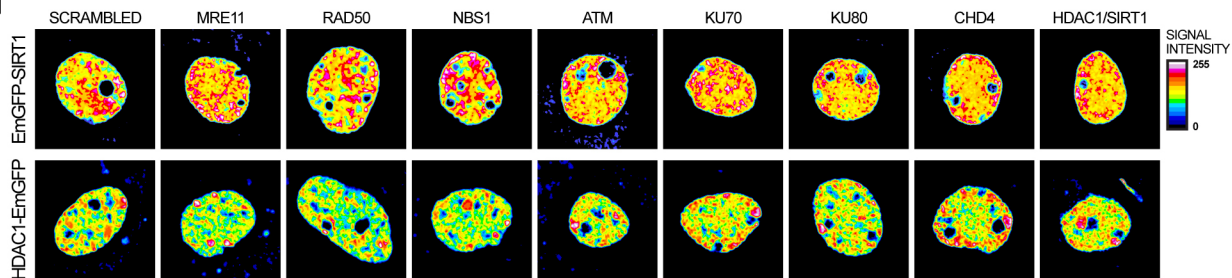

**Supplementary Figure 2.** **a**, Schematic of laser microirradiation. A Zeiss LSM710 inverted laser scanning confocal microscope equipped with a 405nm diode laser was used to irradiate a thin sub-nuclear strip of Hoechst-stained primary neurons. Localization of proteins to sites of laser-induced DNA DSBs can be monitored as increased fluorescence intensity within lesioned regions as visualized either by immunocytochemistry of fixed cells (for instance,  $\gamma$ H2AX) or through live imaging of cells carrying fluorescently tagged repair proteins. **b**, Serial attenuation of transmitted 405 nm wavelength light emitted from a continuous-wave diode laser yields a dose-dependency in  $\gamma$ H2AX signal intensity within lesion ROIs. ROI area ( $2\mu\text{m}^2$ ), laser power (100%), and scan iterations were held constant for Hoechst33242 pre-sensitized neuronal nuclei, while percent transmission was varied as indicated. Neurons were then fixed and stained with  $\gamma$ H2AX. Scale bar =  $7\mu\text{m}$ . **c**, Table indicating the time taken by EmGFP-SIRT1 (left) and HDAC1-EmGFP (right) to attain half-maximal fluorescence intensity in the lesioned region following the knockdown of the DSB components in Fig. 3d. **d**, Representative images of EmGFP-SIRT1 (top) and HDAC1-EmGFP (bottom) expressing neurons that were transfected with the indicated siRNAs to show that the various siRNAs did not affect expression of the two proteins.

## Supplementary Figure 3

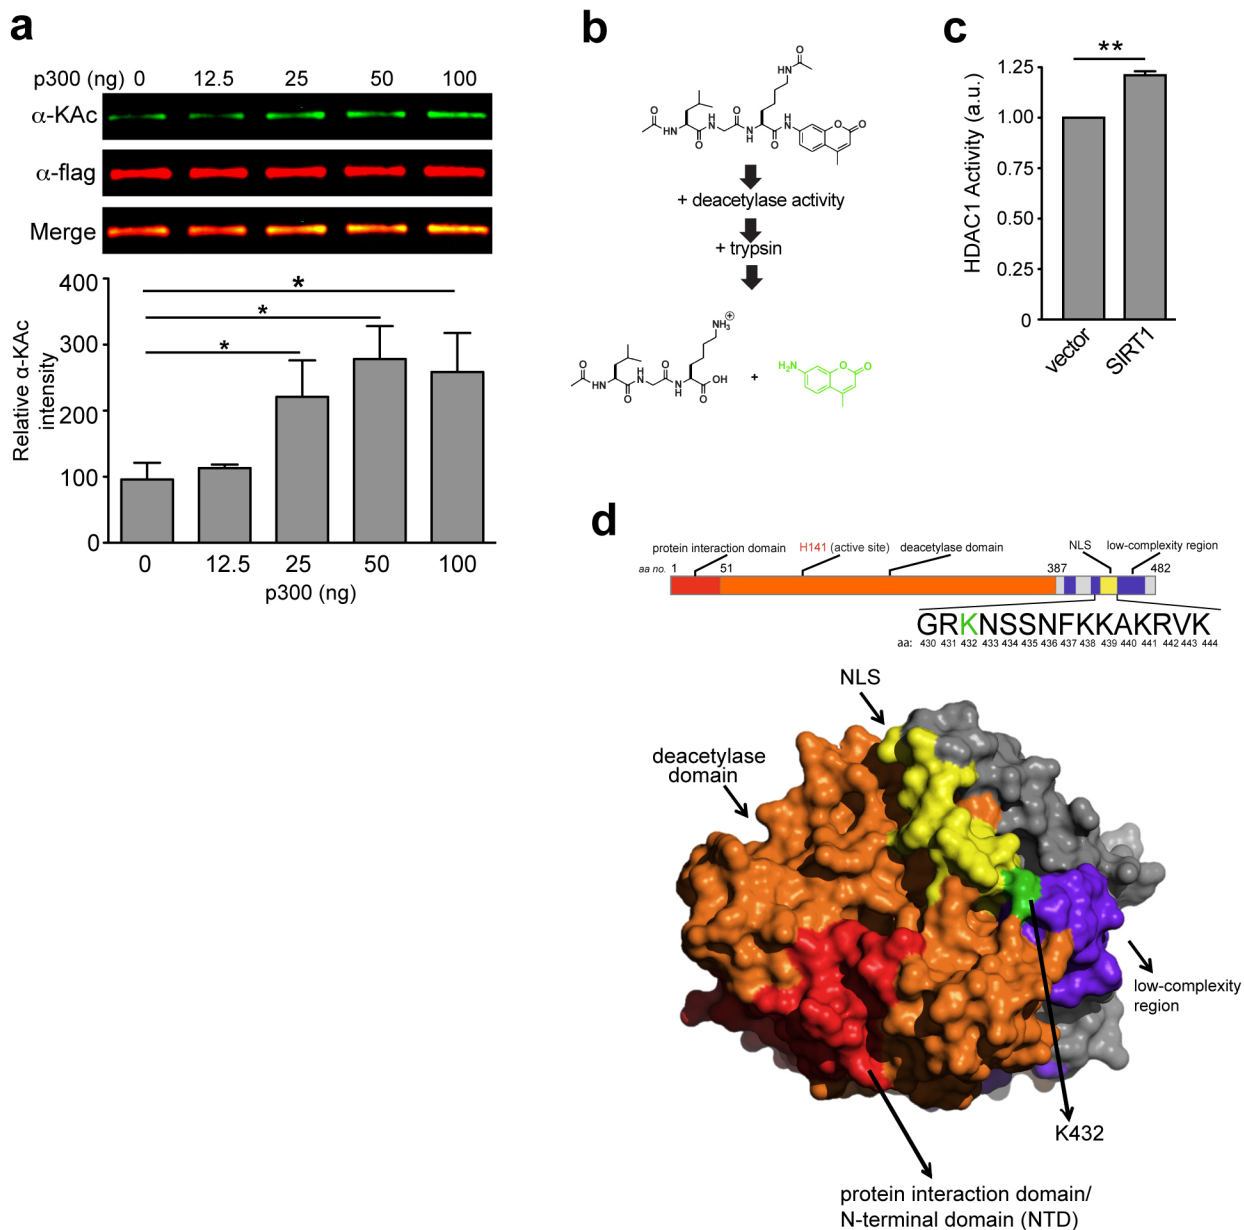

**Supplementary Figure 3. a**, Increasing amounts of p300 were incubated with a fixed amount of HDAC1 and the effect of p300 on the acetylation of HDAC1 was assessed using quantitative western blotting (\*  $p < 0.05$ , one-way ANOVA). **b**, Schematic of a fluorescence-based reporter assay used to measure HDAC1 enzymatic activity. Deacetylation of the substrate sensitizes it to cleavage by trypsin, which results in the release of a fluorescent moiety (green). Fluorescence intensity is thus used as an indicator of deacetylase activity. **c**, HEK293T cells were transfected with either an empty vector or a vector carrying SIRT1. HDAC1 was then immunoprecipitated, and its activity was measured as described in b (\* $p < 0.01$ , unpaired t-test). **d**, Sequence and structural information from an already crystallized HDAC1 ancestor from the hyperthermophilic bacterium *Aquifex aeolicus* (PMID: 10490031) was used to generate a computational model predicting the tertiary structure of HDAC1. Identical domain color scheme was utilized in domain illustration and predicted structure rendering. Green indicates the position of the lysine residue, K432.

# Supplementary Figure 4

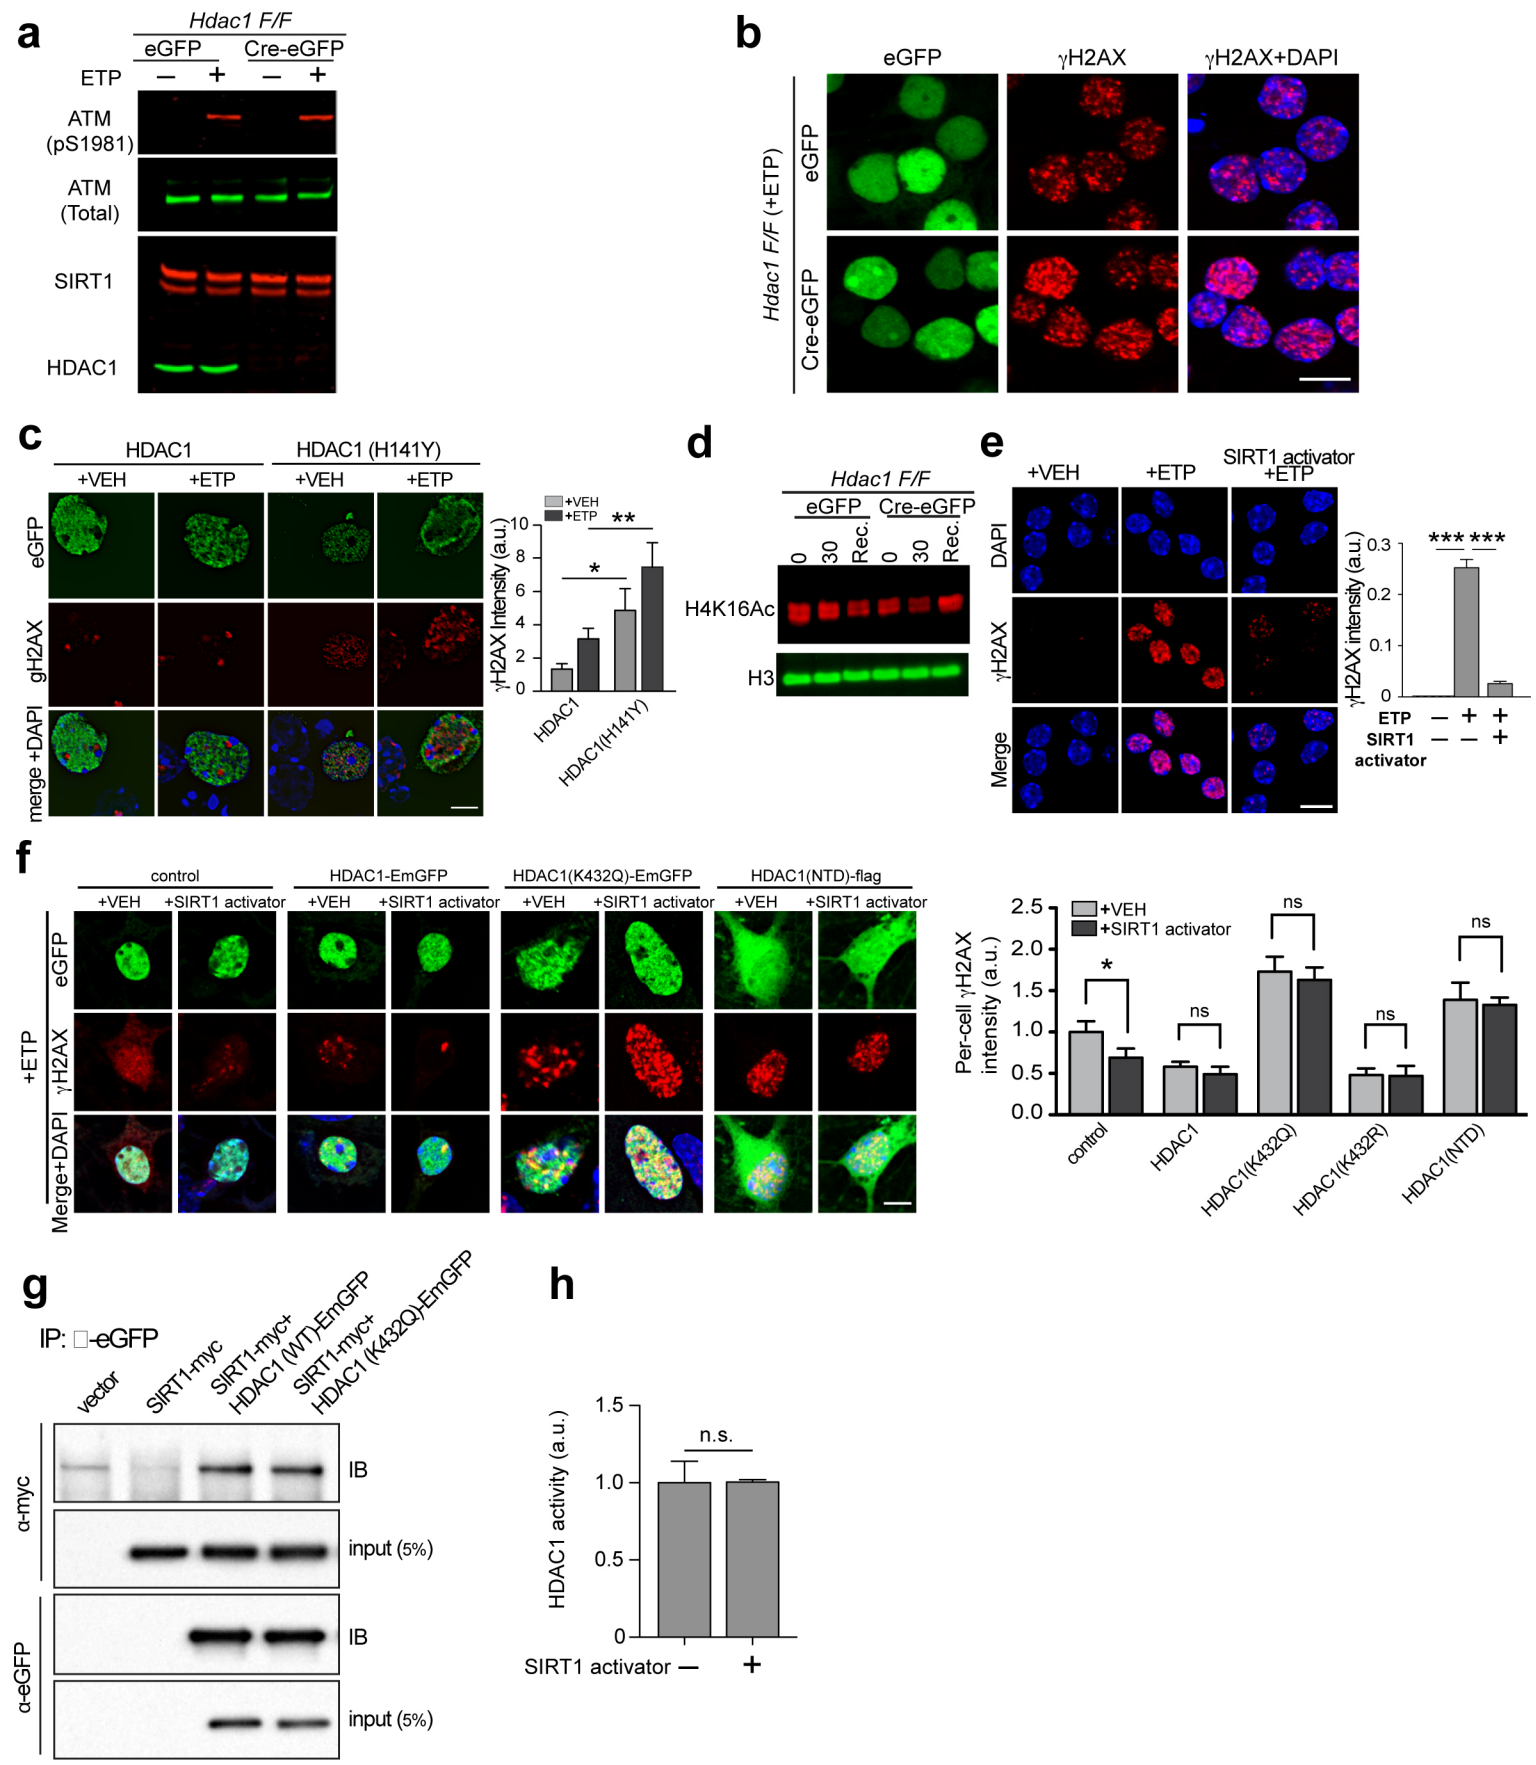

Supplement: NIHMS751366-supplement-Supplement.pdf [file NIHMS751366-supplement-Supplement.pdf]
